# Supplementary material
Source: Springer Nature journal article supplement (https://www.springermedizin.de/resource/supplementary/12885_2013_4714_MOESM8_ESM.pdf/9467112)

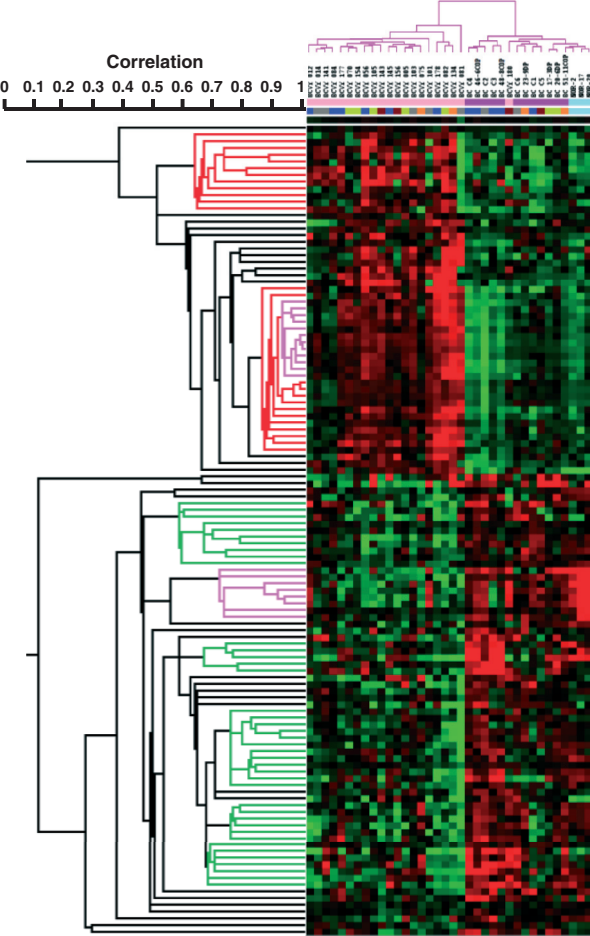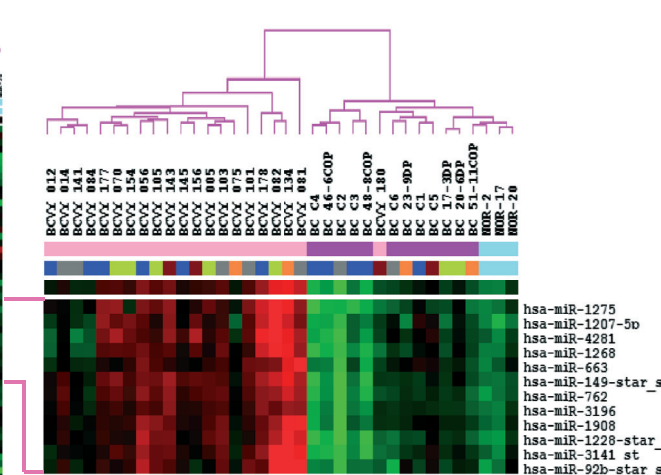

Node 15

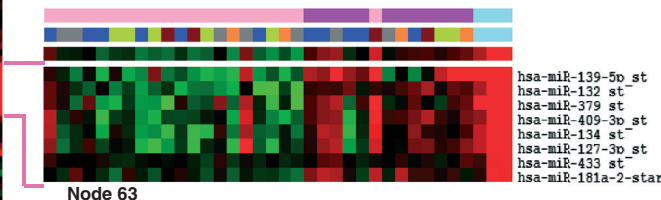

Node 63

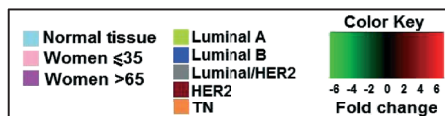

Supplement: MOESM8 [file 9467112]
